# Supplementary material for: Postibrutinib relapse outcomes for patients with marginal zone lymphoma
Source: PubMed Central journal article supplement — Blood Adv. 2022 Oct 29;7(1):88–91. doi: 10.1182/bloodadvances.2022008634 (PMC9827027; doi:10.1182/bloodadvances.2022008634), 2022-10-29

**SUPPLEMENTAL APPENDIX**

|                                                                                 |     |
|---------------------------------------------------------------------------------|-----|
| <b>Table of Contents</b>                                                        | 1   |
| <b>Baseline Characteristics: Table S1</b>                                       | 2-3 |
| <b>Causes of death: Table S2</b>                                                | 4   |
| <b>CONSORT Diagram: Figure S1</b>                                               | 5   |
| <b>PFS to first salvage following ibrutinib progression: Figure S2</b>          | 6   |
| <b>PFS based on individual salvage therapy: Figure S3</b>                       | 7   |
| <b>PFS based on best response to therapy prior to progression: Figure S4</b>    | 8   |
| <b>PR-OS based on ibrutinib line of therapy prior to progression: Figure S5</b> | 9   |

**Table S1. Baseline Characteristics**

|                                           | <b>All patients<br/>N=47 (%)</b> | <b>IB PP<br/>N=15 (%)</b> | <b>IB SP<br/>N=32</b> | <b>p-value</b> |
|-------------------------------------------|----------------------------------|---------------------------|-----------------------|----------------|
| Median age at IB therapy in years (range) | 66 (27-91)                       | 65 (41-91)                | 67 (27-81)            | 0.62           |
| Gender                                    |                                  |                           |                       | 0.76           |
| Male                                      | 20 (43)                          | 7 (47)                    | 13 (41)               |                |
| Female                                    | 27 (57)                          | 8 (53)                    | 19 (59)               |                |
| BMI ≥30                                   | 9 (24)                           | 3 (27)                    | 6 (22)                | 0.99           |
| MZL subtype                               |                                  |                           |                       | 0.56           |
| NMZL                                      | 21 (45)                          | 5 (33)                    | 16 (50)               |                |
| SMZL                                      | 10 (21)                          | 4 (27)                    | 6 (19)                |                |
| EMZL                                      | 16 (34)                          | 6 (40)                    | 10 (31)               |                |
| Stage at diagnosis                        |                                  |                           |                       | 0.99           |
| 1-2                                       | 8 (17)                           | 2 (14)                    | 6 (19)                |                |
| 3-4                                       | 38 (83)                          | 12 (86)                   | 26 (81)               |                |
| B symptoms at diagnosis                   | 11 (23)                          | 3 (20)                    | 8 (25)                | 0.99           |
| LDH >ULN                                  | 10 (26)                          | 4 (36)                    | 6 (21)                | 0.42           |
| Monoclonal protein at diagnosis           | 15 (47)                          | 6 (75)                    | 9 (37)                | 0.11           |
| BM involvement at diagnosis               |                                  |                           |                       | 0.45           |
| No                                        | 10 (26)                          | 5 (39)                    | 5 (20)                |                |
| Yes                                       | 28 (74)                          | 8 (61)                    | 20 (80)               |                |
| Not done                                  | 11                               | 3                         | 8                     |                |
| TP53 mut/17p del                          |                                  |                           |                       | 0.50           |
| No                                        | 26 (93)                          | 7 (88)                    | 19 (95)               |                |
| Yes                                       | 2 (7)                            | 1 (12)                    | 1 (5)                 |                |
| Not tested                                | 19                               | 7                         | 12                    |                |
| Complex cytogenetics                      |                                  |                           |                       |                |
| No                                        | 24 (86)                          | 7 (70)                    | 17 (94)               | 0.09           |
| Yes                                       | 4 (14)                           | 3 (30)                    | 1 (6)                 |                |
| Not tested                                | 19                               | 5                         | 14                    |                |
| Primary refractory disease                | 14 (30)                          | 7 (47)                    | 7 (22)                | 0.08           |
| Frontline therapy                         |                                  |                           |                       | 0.08           |
| R monotherapy                             | 21 (45)                          | 4 (27)                    | 17 (53)               |                |

|                          |         |         |         |      |
|--------------------------|---------|---------|---------|------|
| Immunochemotherapy       | 20 (42) | 10 (66) | 10 (31) |      |
| Others                   | 6 (13)  | 1 (7)   | 5 (16)  |      |
| Receipt of maintenance R |         |         |         | 0.99 |
| No                       | 36 (77) | 12 (80) | 24 (75) |      |
| Yes                      | 11 (23) | 3 (20)  | 8 (25)  |      |

Abbreviations: IB=ibrutinib; PP=primary progressors, SP=secondary progressors, BMI=body mass index, NMZL= nodal MZL, SMZL=splenic MZL, EMZL=extranodal MZL, ULN=upper limit of normal, BM=bone marrow, R=rituximab

**Table S2: Causes of death**

|                       | <b>All patients<br/>N=18 (%)</b> | <b>IB PP<br/>N=8 (%)</b> | <b>IB SP<br/>N=10 (%)</b> |
|-----------------------|----------------------------------|--------------------------|---------------------------|
| Lymphoma progression  | 11 (61)                          | 8 (100)                  | 3 (30)                    |
| Infection             | 2* (11)                          | 0                        | 2 (20)                    |
| Chemotherapy toxicity | 1** (6)                          | 0                        | 1 (10)                    |
| Organ failure         | 2^ (11)                          | 0                        | 2 (20)                    |
| Missing/unknown       | 2 (11)                           | 0                        | 2 (20)                    |

Abbreviations: IB=ibrutinib; PP=primary progressors, SP=secondary progressors

\*Infectious complications due to other lymphoma directed therapy

\*\*Chemotherapy toxicity due to other lymphoma directed therapy

^Organ failure was not related to lymphoma directed therapies

Figure S1. CONSORT diagram

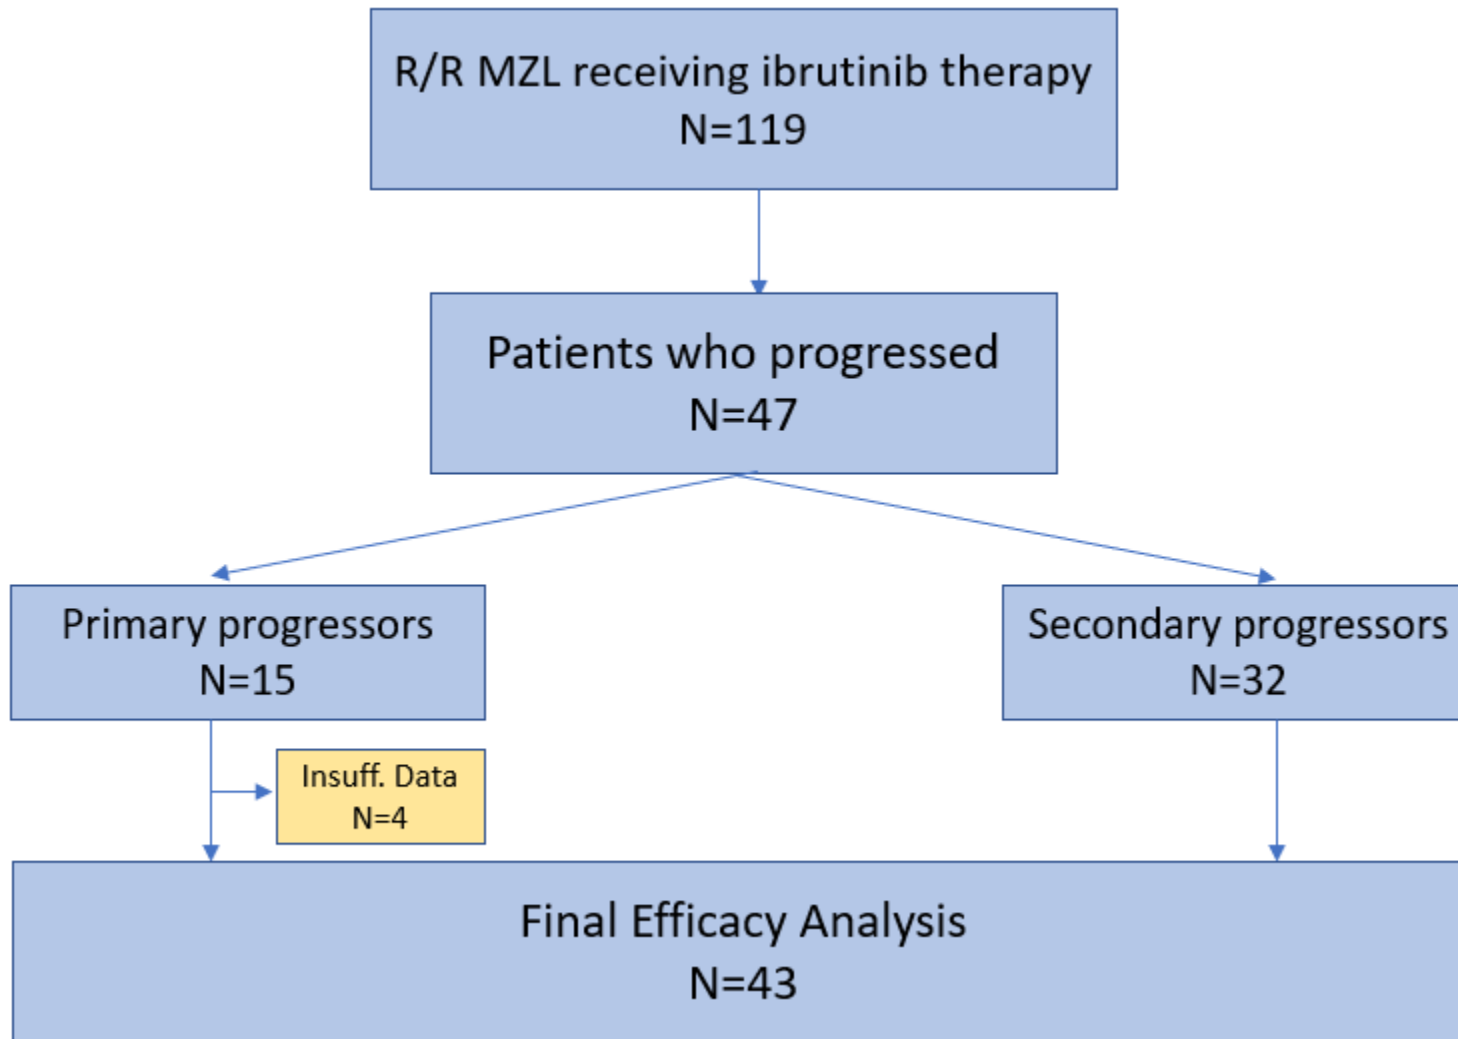

Figure S2. PFS following ibrutinib progression/relapse among patients who received salvage therapy

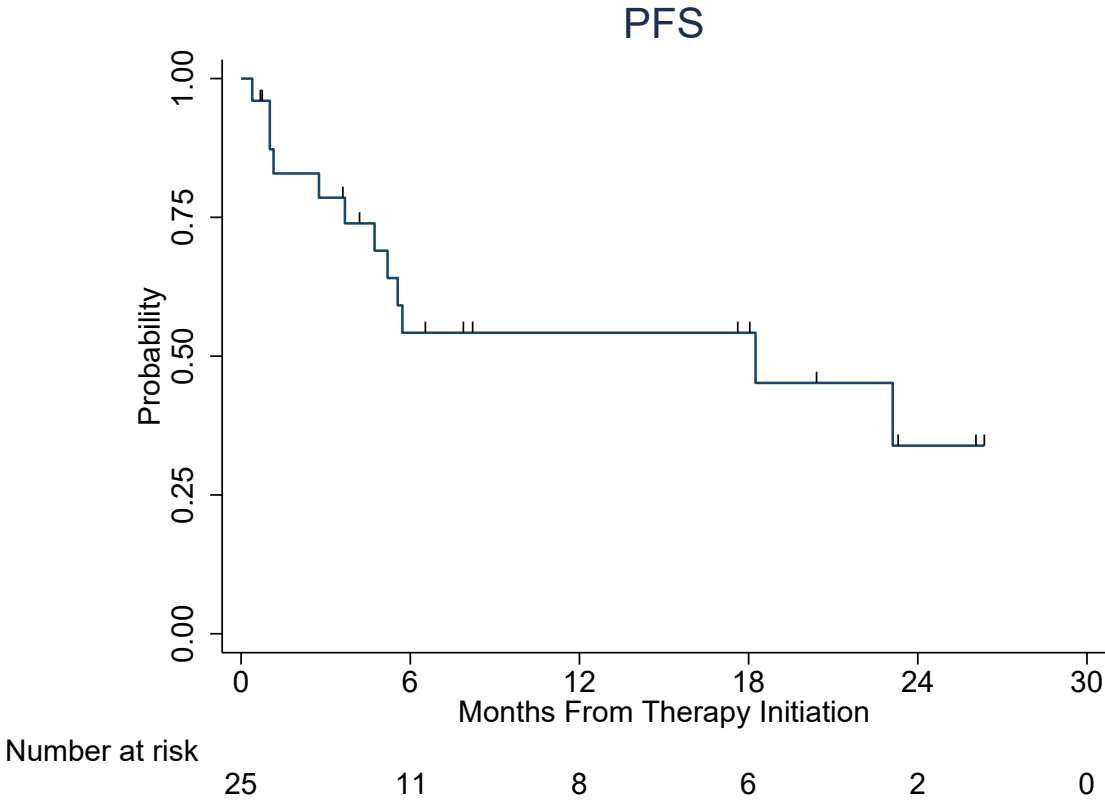

Figure S3. PFS following ibrutinib progression/relapse based on individual salvage therapy

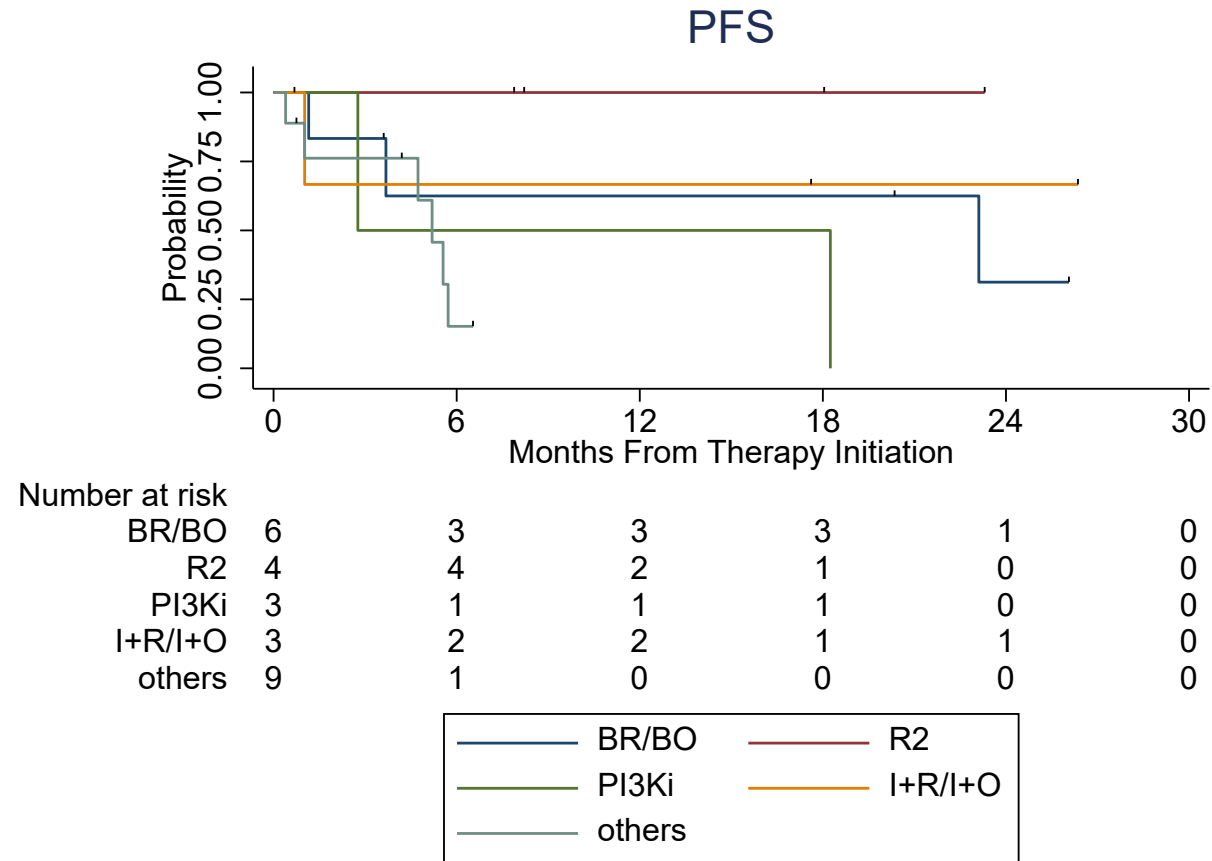

Figure S4. PFS following ibrutinib progression/relapse based on best response to ibrutinib prior to progression

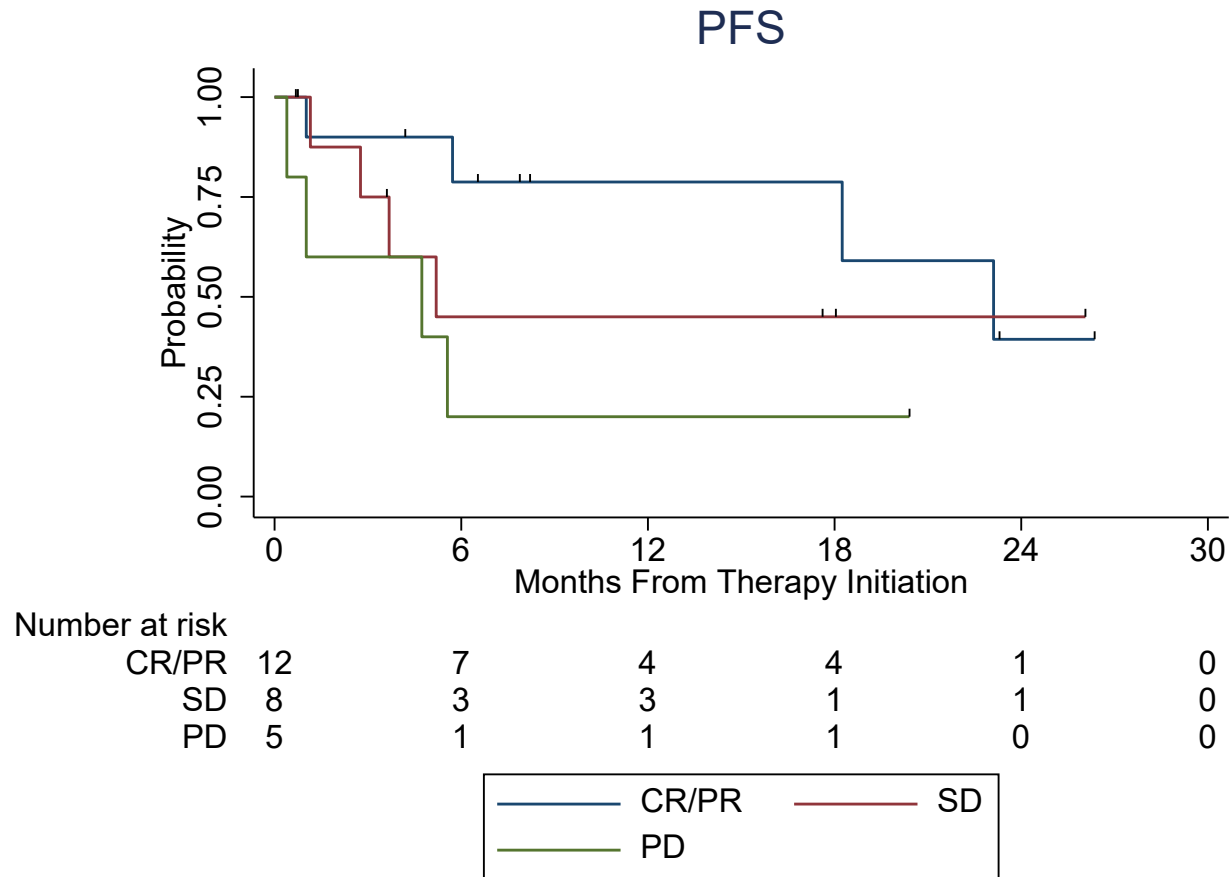



Figure S5. PR-OS based on the ibrutinib line of therapy prior to progression

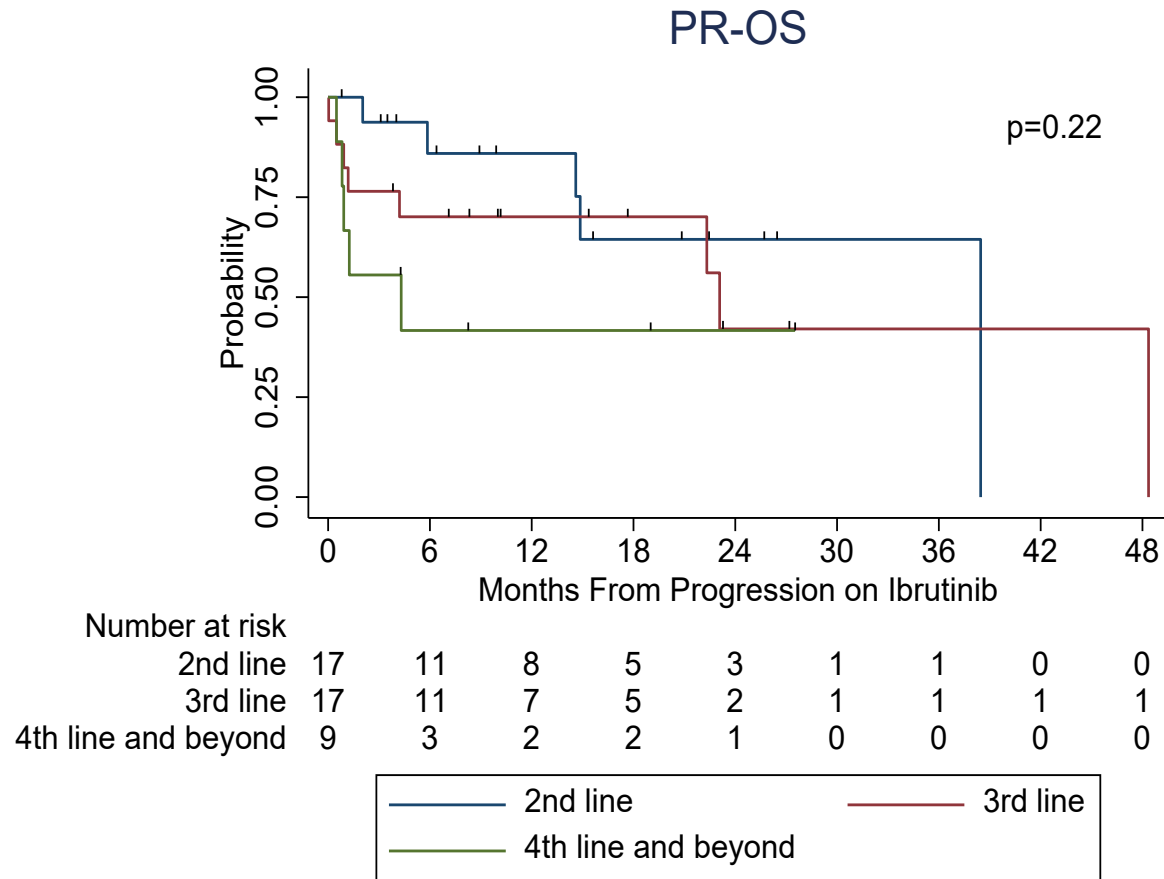

Supplement: BLOODA_ADV-2022-008634-mmc1.pdf [file BLOODA_ADV-2022-008634-mmc1.pdf]
